# Supplementary material for: A new synthesis for terrestrial nitrogen inputs
Source: Copernicus journal article supplement (doi:10.5194/soil-1-381-2015), 2015-04-21
Supplement: Supplementary file 1 [file soil-1-381-2015-supplement.pdf]

Supplement of SOIL, 1, 381–397, 2015  
<http://www.soil-journal.net/1/381/2015/>  
doi:10.5194/soil-1-381-2015-supplement  
© Author(s) 2015. CC Attribution 3.0 License.

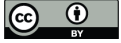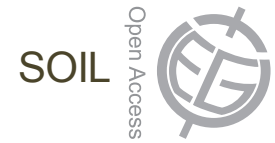

*Supplement of*

## **A new synthesis for terrestrial nitrogen inputs**

**B. Z. Houlton and S. L. Morford**

*Correspondence to:* B. Z. Houlton (bzhoulton@ucdavis.edu)

**Supplemental Table:** Summary of ecosystem nitrogen accretion values from Binkey et al. (2000) and Johnson et al. (2014). The lithology at each study site was evaluated for potential N enrichment given the type of host rock.

| Reference(s)                                       | Location                                                        | N accretion<br>(kg ha <sup>-1</sup> yr <sup>-1</sup> ) | Parent Material                                         | Parent Material N<br>Potential | Notes                                                                  |
|----------------------------------------------------|-----------------------------------------------------------------|--------------------------------------------------------|---------------------------------------------------------|--------------------------------|------------------------------------------------------------------------|
| Bormann et al. (1993)                              | Hubbard Brook Experimental Forest (Sandbox), New Hampshire, USA | 60 to 152                                              | alluvium (low N)                                        | No                             |                                                                        |
| Dickson & Crocker (1953),<br>Sollins et al. (1983) | Mt. Shasta, California, USA                                     | 5 to 60                                                | Mudflow (Volcanic: mafic-intermediate)                  | No                             | unknown if mudflows contain N from soils/vegetation caught up in flow? |
| Turner and Lambert (2011)                          | Sunny Corner Forest, New South Wales, AU                        | 13 to 22                                               | Volcanic (felsic)                                       | No                             | Included only R0N0B0 and R0N0B0 treatments.                            |
| Morrison and Foster (2001)                         | Turkey Lakes, Ontario, CA                                       | 16                                                     | Igneous/Meta-igneous (Greestone and Granite)            | No                             |                                                                        |
| Richter and Markewitz (2000)                       | Calhoun Forests, South Carolina, USA                            | 0 to 14                                                | Granodiorite                                            | No                             |                                                                        |
| Bormann & Likens (1977)                            | Hubbard Brook Experimental Forest, New Hampshire, USA           | 14                                                     | high-grade metasedimentary (amphibolite)                | No                             |                                                                        |
| Alriksson & Olsson (1995)                          | Southern Sweden                                                 | -18 to 12                                              | Granite                                                 | No                             |                                                                        |
| Garcia-Montiel (1996)                              | Luquillo Experimental Forest, Puerto Rico                       | -5.7 to 6.2                                            | Tuff Breccia                                            | No                             |                                                                        |
| Aguilera et al. (1993)                             | H. J. Andrews Research Forest, Blue River, Oregon, USA.         | 2 to 3                                                 | Volcanic: mafic-intermediate                            | No                             |                                                                        |
| Johnson et al. (1995)                              | Hubbard Brook Experimental Forest, New Hampshire, USA           | 0                                                      | high-grade metasedimentary (amphibolite)                | No                             |                                                                        |
| Knoepp & Swank (1997)                              | Coweeta Hydrologic Laboratory, North Carolina, USA              | -60 to -50                                             | high-grade meta-igneous & metasedimentary (amphibolite) | No                             |                                                                        |
| Fisher & Eastburn (1974)                           | Illinois, USA                                                   | 0 to 110                                               | Sedimentary (siliciclastic and carbonate)               | Yes                            | Parent material inferred from soil series description in paper         |
| Johnson & Todd (1998)                              | Walker Branch Watershed, Tennessee, USA                         | 44 to 87                                               | Sedimentary (carbonate and siliciclastic)               | Yes                            |                                                                        |
| Eriksson & Rosen (1994)                            | Susegården, Halmstad, Sweden                                    | 0 to 50                                                | Till                                                    | Yes                            |                                                                        |
| Day et al. (1975)                                  | Broadbalk experiment, Rothamsted, UK                            | 48                                                     | Sedimentary (carbonate/marl)                            | Yes                            |                                                                        |
| Johnson et al. (2007)                              | Walker Branch Watershed, Tennessee, USA                         | -15 to 43                                              | Sedimentary (carbonate and siliciclastic)               | Yes                            |                                                                        |
| Son & Gower (1992)                                 | Coulee Experimental Forest, Wisconsin, USA                      | 10 to 40                                               | Sedimentary (siliciclastic and carbonate)               | Yes                            |                                                                        |
| Turner et al. (2002), Binkley et al. (2003)        | Penrose State Forest, New South Wales, AU                       | 16 to 24                                               | Sedimentary (Siliciclastic)                             | Yes                            |                                                                        |

**Supplemental Table:** Continued.

| <b>Reference(s)</b>                               | <b>Location</b>                                       | <b>N accretion<br/>(kg ha<sup>-1</sup> yr<sup>-1</sup>)</b> | <b>Parent Material</b>                       | <b>Parent Material N<br/>Potential</b> | <b>Notes</b>                                            |
|---------------------------------------------------|-------------------------------------------------------|-------------------------------------------------------------|----------------------------------------------|----------------------------------------|---------------------------------------------------------|
| Jorgensen & Wells (1971),<br>Binkley et al.(1992) | Westvaco experimental forest, South<br>Carolina, USA  | 0 to 23                                                     | alluvium (sedimentary provinace)             | Yes                                    |                                                         |
| Turner & Lambert (2013)                           | Lidsdale State Forest, Sydney, AU                     | 20.4                                                        | Sedimentary (Siliciclastic)                  | Yes                                    |                                                         |
| Johnson et al (2003b)                             | Walker Branch Watershed, Tennessee,<br>USA            | 20                                                          | Sedimentary (carbonate and<br>siliciclastic) | Yes                                    |                                                         |
| Guo et al. (2008)                                 | Kowen Forest, Australian Capital<br>Territory, AU     | 17.2                                                        | Sedimentary (Siliciclastic)                  | Yes                                    |                                                         |
| Turner & Lambert (1986)                           | Belango State Forest, New South Wales,<br>AU          | 17                                                          | Sedimentary (Siliciclastic)                  | Yes                                    |                                                         |
| Trettin & Johnson (2000)                          | Walker Branch Watershed, Tennessee,<br>USA            | -76 to 6                                                    | Sedimentary (carbonate and<br>siliciclastic) | Yes                                    |                                                         |
| Hopmans & Elms (2009)                             | Victoria, Australia                                   | 4.2                                                         | Sedimentary (carbonate and<br>siliciclastic) | Yes                                    |                                                         |
| Kiser (2009)                                      | Camp Branch Experimental Watershed,<br>Tennessee, USA | 3                                                           | Sedimentary (Siliciclastic)                  | Yes                                    |                                                         |
| Johnson et al. (2003a)                            | Kennedy Space Center, Florida USA                     | -32 to -3                                                   | Quaternary alluvium                          | Yes                                    |                                                         |
| Jenny (1980), Dormar &<br>Lutwick (1966)          | Alberta, Canada                                       | -90                                                         | Sedimentary (Siliciclastic)                  | Yes                                    |                                                         |
| Turvey & Smethurt (1988)                          | Victoria, Australia                                   | 0                                                           | unknown                                      | unknown                                | reference unavailable (excluded from<br>plot)           |
| Bacon et al. (1996)                               | Whiporie, New South Wales, AU                         | 10.1                                                        | Unknown                                      | Unknown                                | reference unavailable (excluded from<br>plot)           |
| Turner & Lambert (2012)                           | Lidsdale, New South Wales, AU                         | 8.5                                                         | Unknown                                      | Unknown                                | Either Granite or siliciclastic (excluded<br>from plot) |
| Mroz et al. (1985)                                | Upper Michigan                                        | -450                                                        | alluvium (sedimentary provinace)             | Yes                                    | Soil Removal drove N loss (excluded<br>from plot)       |
